# Supplementary material for: Evaluation of lexical clarification by patients reading their clinical notes: a quasi-experimental interview study
Source: BMC Med Inform Decis Mak. 2020 Dec 15;20(Suppl 10):278. doi: 10.1186/s12911-020-01286-9 (PMC7737248; doi:10.1186/s12911-020-01286-9)
Supplement: Supplementary file 2 — Additional file 2. Spreadsheet with detailed statistics from R-script output. [file 12911_2020_1286_MOESM2_ESM.xlsx]

## Sheet: Log
datetime	category	message
2020-05-26 18:43:27.074	Information	Loaded functions
2020-05-26 18:43:30.747	Information	Loaded data
2020-05-26 18:43:33.225	Information	Filtered out 1 empty letters based on having an empty MedicalLetter and empty LetterType field
2020-05-26 18:43:33.604	Information	Excluded letter 'Medical letter - 31-10-2019 12:52:09' because it was directed at the patient himself.
2020-05-26 18:43:34.325	Warning	Found letter(s) without any difficult terms:
2020-05-26 18:43:34.391	Warning	Record.Id Letter.Id LetterNumber Report.Name.Custom LetterType Specialty KnowsLetter KnowsLetterContent
2020-05-26 18:43:34.393	Warning	120006 11 1 Medical letter - 05-11-2019 14:12:51 Behandelverslag Nefrologie 1 1
2020-05-26 18:43:34.394	Warning	120009 18 1 Medical letter - 15-11-2019 11:06:09 Behandelverslag Verpleegkunde 0 1
2020-05-26 18:43:34.511	Warning	Found letter(s) without clarifications:
2020-05-26 18:43:34.513	Warning	Record.Id Letter.Id LetterNumber Report.Name.Custom LetterType Specialty KnowsLetter KnowsLetterContent
2020-05-26 18:43:34.515	Warning	120003 4 1 Medical letter - 31-10-2019 11:09:17 Behandelverslag Oogheelkunde 0 1
2020-05-26 18:43:34.735	Warning	Filtered out 11 empty terms based on having an empty Term field
2020-05-26 18:43:37.738	Warning	Filtered out 11 clarifications without a ClarifiedTerm
2020-05-26 18:43:42.981	Information	Finished script

## Sheet: Table1
statistic	description	value	unit
Gender	Male	8 (53)	n (%)
	Female	7 (47)	n (%)
	Other	0 (0)	n (%)
Age		57 (34-70)	median (range)
Age group	0 - 18 years	0 (0)	n (%)
	19 - 29 years	0 (0)	n (%)
	30 - 39 years	1 (7)	n (%)
	40 - 49 years	0 (0)	n (%)
	50 - 59 years	8 (53)	n (%)
	60 - 69 years	4 (27)	n (%)
	70 - 79 years	2 (13)	n (%)
	80 - 89 years	0 (0)	n (%)
	90 - 99 years	0 (0)	n (%)
	100 - 119 years	0 (0)	n (%)
Education	No education	0 (0)	n (%)
	Elementary school	0 (0)	n (%)
	Lower secondary education	2 (13)	n (%)
	Preparatory vocational secondary education	2 (13)	n (%)
	Vocational education and training	3 (20)	n (%)
	Senior general or university preparatory secondary education	0 (0)	n (%)
	Higher professional education	7 (47)	n (%)
	Research-oriented higher education	1 (7)	n (%)
TreatmentDuration	< 3 years	3 (20)	n (%)
	3 - 10 years	5 (33)	n (%)
	> 10 years	7 (47)	n (%)
WorksInHealthCare	Yes, currently	0 (0)	n (%)
	Yes, in the past	8 (53)	n (%)
	Never	7 (47)	n (%)
Health literacy	Inadequate (SBSQ <= 2)	0 (0)	n (%)
	Adequate (SBSQ > 2)	15 (100)	n (%)

## Sheet: Participants
Record.Id	Age	Education	TreatmentDuration	WorksInHealthCare	HelpedByOthers	ConfidenceFillingForms	UnderstandsWrittenInformation	SBSQ	NumberOfLetters	Freq.Behandelverslag	Freq.Ontslagbrief	Freq.Poliklinische brief	Specialties	Terms	TermDifficultyMedian	TermDifficultyIqr	TermsClarified	ClarifiedPercentage	TermsClarifiedClarificationNotRated	TermsClarifiedClarificationDifficulty	TermsClarifiedClarificationUsefulness	EasyClarifiedClarificationNotRated	EasyClarifiedClarificationDifficulty	EasyClarifiedClarificationUsefulness	EasyTermDifficulty	Clarifications	precision	lowerPrecision	upperPrecision	recall	lowerRecall	upperRecall	ToolDifficulty	ToolUsefulness
120001	60-69	Higher professional education	3 - 10 years	Never	Occasionally	Extremely	Sometimes	3	1	0	0	1	Infectieziekte	50	0	0 - 10.75	6	0.12	3	84	98	16	95	27	97	48	0.125	0.0314391	0.218561	0.12	0.0299253	0.210075	95	97
120002	50-59	Higher professional education	> 10 years	Yes, in the past	Never	Quite a bit	Occasionally	3.33333	2	1	0	1	Urologie, Cardiologie	21	6	0 - 8	1	0.048	0	93	97	0	95	93	95	34	0.0294118	0	0.0862047	0.047619	0	0.138703	98	99
120003	70-79	Preparatory vocational secondary education	> 10 years	Yes, in the past	Occasionally	Quite a bit	Occasionally	3	3	2	0	1	Endocrinologie, Oogheelkunde, Oogheelkunde	19	12	8.5 - 32	1	0.053	0	4	2	0	94	23.5	100	49	0.0204082	0	0.0599979	0.0526316	0	0.153038	99	56
120004	50-59	Vocational education and training	< 3 years	Yes, in the past	Occasionally	Quite a bit	Occasionally	3	1	0	0	1	Nefrologie	21	0	0 - 0	2	0.095	0	99.5	100	0	100	0	100	20	0.1	0	0.231481	0.0952381	0	0.220789	89	46
120005	50-59	Higher professional education	> 10 years	Never	Never	Extremely	Occasionally	3.66667	3	2	0	0	Chirurgie, Longziekten, Neurologie	31	12	3 - 39	2	0.065	0	60.5	99.5	5	81	2	99	26	0.0769231	0	0.179351	0.0645161	0	0.150998	99	100
120006	30-39	Vocational education and training	> 10 years	Yes, in the past	Sometimes	Extremely	Occasionally	3	3	2	0	1	Dermatologie, Nefrologie, Gynaecologie	21	75	65 - 78	4	0.19	0	100	17.5	0	100	14	100	25	0.16	0.0162904	0.30371	0.190476	0.0225256	0.358427	100	49
120007	70-79	Higher professional education	< 3 years	Yes, in the past	Occasionally	Quite a bit	Never	3.33333	2	1	0	1	Vasculaire geneeskunde, Cardiothoracale chirurgie	31	25	16.5 - 32.5	0	0				11	97	3	98	36	0	0	0	0	0	0	98	51
120008	60-69	Higher professional education	3 - 10 years	Yes, in the past	Never	Quite a bit	Occasionally	3.33333	2	1	0	1	Oncologie, Oncologie	22	16.5	8 - 26.5	1	0.045	0	96	97	0	96	4	97	24	0.0416667	0	0.121614	0.0454545	0	0.132497	96	19
120009	50-59	Vocational education and training	> 10 years	Never	Never	Extremely	Occasionally	3.66667	3	1	1	1	Endocrinologie, Endocrinologie, Verpleegkunde	7	0	0 - 8	0	0				0	100	0.5	100	20	0	0	0	0	0	0	50	83
120010	60-69	Higher professional education	> 10 years	Never	Never	Extremely	Never	4	2	1	0	1	Oogheelkunde, Vaatchirurgie	46	32.5	21 - 51	9	0.196	0	94	90	0	94.5	5	95	19	0.473684	0.249168	0.6982	0.195652	0.0810108	0.310294	95	97
120011	50-59	Lower secondary education	3 - 10 years	Never	Never	Extremely	Occasionally	3.66667	2	1	0	1	Chirurgie, Chirurgie	17	7	1 - 13	4	0.235	0	95	97	0	100	0	100	17	0.235294	0.0336506	0.436938	0.235294	0.0336506	0.436938	100	100
120012	50-59	Preparatory vocational secondary education	< 3 years	Never	Never	Quite a bit	Occasionally	3.33333	3	1	1	1	Neurologie, Neurologie, Neurologie	50	8.5	0 - 18.5	5	0.1	1	72	85	11	99	1	99	26	0.192308	0.0408153	0.3438	0.1	0.0168442	0.183156	100	79
120013	50-59	Lower secondary education	> 10 years	Never	Never	Extremely	Sometimes	3.33333	2	1	0	1	Endocrinologie, Endocrinologie	20	8	7 - 9	3	0.15	0	79	82	17	50.5	30.5	87	46	0.0652174	0	0.136571	0.15	0	0.306493	40	97
120014	50-59	Higher professional education	3 - 10 years	Yes, in the past	Sometimes	Extremely	Occasionally	3	2	1	0	1	Diabetes, Diabetologie	12	49.5	48.75 - 61.75	1	0.083	0	11	76	30	97	2	99	44	0.0227273	0	0.0667636	0.0833333	0	0.239713	98	54
120015	60-69	Research-oriented higher education	3 - 10 years	Yes, in the past	Never	Extremely	Never	4	2	1	0	1	Oogheelkunde, Revalidatiegeneeskunde	31	7	6 - 33	1	0.032	0	97	51	26	91	5	97	44	0.0227273	0	0.0667636	0.0322581	0	0.0944557	92	74

## Sheet: Letters
Report.Name.Custom	Record.Id	Letter.Id	LetterNumber	LetterType	Specialty	KnowsLetter	KnowsLetterContent	Terms	TermDifficultyMedian	TermDifficultyIqr	TermsClarified	Clarifications
Medical letter - 28-10-2019 12:19:53	120001	1	1	Poliklinische brief	Infectieziekte	1	1	50	0	0 - 10.75	6	48
Medical letter - 29-10-2019 11:54:09	120002	2	2	Behandelverslag	Cardiologie	1	1	7	6	5.5 - 7.5	0	5
Medical letter - 29-10-2019 12:08:00	120002	3	3	Poliklinische brief	Urologie	1	1	14	2	0 - 22.75	1	31
Medical letter - 31-10-2019 11:09:17	120003	4	1	Behandelverslag	Oogheelkunde	0	1	0			0	0
Medical letter - 31-10-2019 11:11:16	120003	5	2	Behandelverslag	Oogheelkunde	0	1	7	30	10.5 - 35	0	1
Medical letter - 31-10-2019 11:15:39	120003	6	3	Poliklinische brief	Endocrinologie	1	1	12	11.5	6 - 27.25	1	48
Medical letter - 31-10-2019 13:02:05	120004	7	2	Poliklinische brief	Nefrologie	9	1	21	0	0 - 0	2	20
Medical letter - 01-11-2019 11:17:44	120005	8	1	Behandelverslag	Chirurgie	1	1	5	18	16 - 22	1	5
Medical letter - 01-11-2019 11:33:25	120005	9	2	Behandelverslag	Longziekten	0	1	9	78	25 - 90	0	14
Medical letter - 01-11-2019 11:46:34	120005	10	3	SEH-brief	Neurologie	9	9	17	3	2 - 5	1	9
Medical letter - 05-11-2019 14:12:51	120006	11	1	Behandelverslag	Nefrologie	1	1	0			0	3
Medical letter - 05-11-2019 14:16:30	120006	12	2	Poliklinische brief	Dermatologie	1	1	16	75.5	64.5 - 78	4	21
Medical letter - 05-11-2019 14:36:22	120006	13	3	Behandelverslag	Gynaecologie	1	1	5	74	68 - 78	1	3
Medical letter - 08-11-2019 09:46:07	120007	14	1	Behandelverslag	Cardiothoracale chirurgie	1	1	15	18	15 - 26.5	0	3
Medical letter - 08-11-2019 09:46:55	120007	15	2	Poliklinische brief	Vasculaire geneeskunde	1	1	16	30.5	22.5 - 62	0	33
Medical letter - 13-11-2019 12:41:19	120008	16	1	Behandelverslag	Oncologie	1	1	5	6	5 - 7	0	3
Medical letter - 13-11-2019 12:45:07	120008	17	2	Poliklinische brief	Oncologie	1	1	17	22	14 - 31	1	25
Medical letter - 15-11-2019 11:06:09	120009	18	1	Behandelverslag	Verpleegkunde	0	1	0			0	1
Medical letter - 15-11-2019 11:07:40	120009	19	2	Poliklinische brief	Endocrinologie	0	1	6	0	0 - 12	0	8
Medical letter - 15-11-2019 11:08:15	120009	20	3	Ontslagbrief	Endocrinologie	1	1	1	0	0 - 0	0	12
Medical letter - 19-11-2019 12:14:00	120010	21	1	Behandelverslag	Oogheelkunde	0	9	26	48.5	23.25 - 51	5	6
Medical letter - 19-11-2019 12:20:44	120010	22	2	Poliklinische brief	Vaatchirurgie	0	1	20	22.5	18.75 - 47.25	4	13
Medical letter - 20-11-2019 14:36:57	120011	23	1	Behandelverslag	Chirurgie	1	1	6	19.5	10 - 37.25	2	8
Medical letter - 20-11-2019 14:47:02	120011	24	2	Poliklinische brief	Chirurgie	1	1	11	1	0 - 7	3	13
Medical letter - 20-11-2019 15:52:22	120012	25	1	Behandelverslag	Neurologie	1	1	10	13	7.25 - 24.5	0	5
Medical letter - 20-11-2019 15:55:56	120012	26	2	Poliklinische brief	Neurologie	1	1	10	11	5.5 - 34	0	4
Medical letter - 20-11-2019 15:59:17	120012	27	3	Ontslagbrief	Neurologie	1	1	30	0.5	0 - 17.75	5	23
Medical letter - 21-11-2019 14:16:31	120013	28	1	Behandelverslag	Endocrinologie	0	1	2	20.5	15.75 - 25.25	0	2
Medical letter - 21-11-2019 14:17:35	120013	29	2	Poliklinische brief	Endocrinologie	1	0	18	8	7 - 9	3	46
Medical letter - 21-11-2019 15:12:20	120014	30	1	Behandelverslag	Diabetes	1	1	8	51.5	48.75 - 91.25	0	11
Medical letter - 21-11-2019 15:14:15	120014	31	2	Poliklinische brief	Diabetologie	1	1	4	49	48.75 - 49.25	1	37
Medical letter - 27-11-2019 13:26:27	120015	32	1	Behandelverslag	Oogheelkunde	0	1	7	11	9.5 - 40	0	12
Medical letter - 27-11-2019 13:27:01	120015	33	2	Poliklinische brief	Revalidatiegeneeskunde	0	1	24	7	5.75 - 23.5	1	37

## Sheet: Terms
Record.Id	Term	TermDifficulty
120001	Neisseria Gonorrhoeae	34
120001	OSAS onderzoek	0
120001	TAF screening	15
120001	PTH	0
120001	CWK	0
120001	Chlamydia trachomatis	22
120001	Propranolol	1
120001	TURP	1
120001	DD	70
120001	CD4 257, VL 6.7 x 10exp4	17
120001	hypercholesterolemie	65
120001	nadir	0
120001	pt	94
120001	TPHA, HCV a.s. Neg	0
120001	U/L	0
120001	CD4 relatief [...], CD4 absoluut [...]	16
120001	DNA PCR	0
120001	eGFR (CKD-EPI)	0
120001	Creatinine	0
120001	Alkalische fosfatase	0
120001	Trombocyten	15
120001	CVRM 23%	0
120001	Dexascan	16
120001	HNP	0
120001	M. Grover	0
120001	negatieve anti-HbS	0
120001	osteoporose screening	16
120001	surmenage cervicale segmenteen/facet	26
120001	Triglyceriden	0
120001	HIV-1, subtype B	7
120001	cART	0
120001	mmol/L	0
120001	hypokinetisch-rigide syndroom	0
120001	HBV vaccinatie	1
120001	RR	0
120001	coeur	0
120001	NO	0
120001	25-OH-vitamine D	0
120001	B:	0
120001	HIV VL <50	0
120001	Actinische keratose	0
120001	leukocyten	10
120001	endocrinologie	0
120001	calcium metabolisme	0
120001	Bosniak I	1
120001	Seborrhoisch eczeem	0
120001	benigne	0
120001	Med naast cART	11
120001	BPH, wv TURP/T	5
120001	Immunofenotypering	0
120002	noise	5
120002	precordiale afleidingen	6
120002	dysurie	3
120002	normale repolarisatie	4
120002	trabeculatie	0
120002	detrusoroveractiviteit	1
120002	klokcurve	0
120002	leukocyturie	30
120002	RF-catheterablatie	32
120002	subtotale colectomie	24
120002	bladder outlet obstruction	0
120002	ventriculaire extrasystole	31
120002	detrusorkracht	0
120002	normale R-progressie	6
120002	nycturie	7
120002	revisie atriale (isolatiebreuk)	19
120002	PQ 0,22 sec	8
120002	hesitatie	0
120002	ureterostium	0
120002	Intermediaire hartas	8
120002	normale geleidingstijden voor QRS en QT/QTc	7
120003	OD ec	36
120003	Intoxicaties	2
120003	SLODS: niet afwijkend	10
120003	exoforie	30
120003	ATP +/+	6
120003	MCHC	28
120003	MCV	26
120003	MCH	27
120003	flu-FODS: niet afwijkend	8
120003	isocoor	6
120003	TODS: 13/14 mmHg	11
120003	leukocyten screening	68
120003	corneae gaaf	98
120003	OS ec	34
120003	WT	11
120003	eGFR (CKD-EPI)	45
120003	lnn	6
120003	status na I-131 behandeling	12
120003	ADP +/+	9
120004	Parvo	0
120004	EBV pos	0
120004	glomerulosclerose	0
120004	CMV pos	0
120004	VZV pos	0
120004	colonadenomen	0
120004	gda	0
120004	quantiferon	0
120004	Maligniteiten	0
120004	PA vermeldt FSGS	0
120004	Hep C neg	100
120004	vit Deficiëntie	0
120004	Hep B neg	80
120004	gebit gda	0
120004	Endocrinologie	0
120004	eci	0
120004	duplex	47
120004	HiV neg	100
120004	maligne	0
120004	Heb B gevaccineerd	100
120004	poll MDL	0
120005	rectum	18
120005	dix-hallpike	1
120005	nystagmus	3
120005	tac	90
120005	tinnitus	4
120005	gevoelsstoornis	76
120005	HIT	6
120005	belomethason	78
120005	pulm	92
120005	low anterior	22
120005	kreat	90
120005	iom	2
120005	Brandt Daroff oefeningen	2
120005	Epley manouvre	2
120005	bdzs	25
120005	conversiekans	76
120005	skew dev	5
120005	RR	18
120005	negatieve dix-hallpike	3
120005	hersenzenuwen	51
120005	saccadische correcite	5
120005	BPPD	3
120005	CLAD 0	20
120005	rotatoire nystagmus bij dix-hallpike	2
120005	mesalazine	82
120005	anamnstisch geen vertigo	1
120005	hemicolon	16
120005	decursus	12
120005	Epley	4
120005	VAG	27
120005	visus	3
120006	erythemateuze	66
120006	labia majora	77
120006	usual	65
120006	VIN	60
120006	atypie	91
120006	condylomata acuminata	63
120006	AIN	55
120006	plaveiselcellen	66
120006	tubectomie	79
120006	dysmenorrhoea	56
120006	majora	76
120006	perianaal	75
120006	labium	90
120006	minora	77
120006	congenitaal	86
120006	vulva	78
120006	suspecte	78
120006	cf	1
120006	uterusextirpatie	78
120006	speculo	74
120006	afgeplat	68
120007	mIU	25
120007	VOD	16
120007	TSH	24
120007	DAPT	14
120007	PCI	29
120007	VG	26
120007	consensusrichtlijnen	40
120007	WHR	9
120007	dr verw	17
120007	msr	16
120007	ca-zout-3-water	17
120007	risicoscore	36
120007	PV	16
120007	eGFR	25
120007	lipiden	40
120007	<2.5(M)	72
120007	RCA	18
120007	linker hartas	68
120007	wwsp	21
120007	ml/min/1.73m²	60
120007	QTc	26
120007	OG	14
120007	'15	27
120007	LVF	28
120007	Gi	12
120007	CKD-EPI	23
120007	#	78
120007	PM	9
120007	<3.5(V)	72
120007	+3 na CABGx4	28
120008	mediast	71
120008	CRC	25
120008	tumorload	24
120008	multinodulair	33
120008	papillair	51
120008	adjuvante	12
120008	NED	22
120008	FU CRC	3
120008	niet goed gepallieerd	7
120008	stereotactische	14
120008	expectatief	18
120008	maligniteit	31
120008	lijkt NED	5
120008	oncol	95
120008	ypT2N0G3cM0	7
120008	restadiering	15
120008	ps 1	6
120008	hemithyr	11
120008	VATS	12
120008	VZ	19
120008	globus	7
120008	anterior	27
120009	Gproteinalpha subunit	0
120009	comorbiditeit	0
120009	activerende mutatie	40
120009	diffuus hypofysaire	0
120009	suppressie	0
120009	Hypocortisolinistische crises	0
120009	off-label	16
120010	blefaritis	23
120010	PAOD 2	24
120010	fundoscopie	24
120010	femorofemorale	21
120010	mmHg	90
120010	stenopeisch	13
120010	superior	93
120010	POAG	21
120010	monofasisch	48
120010	arterieel	88
120010	humphrey	31
120010	intraoculaire	88
120010	bifasisch	47
120010	trabeculectomie	21
120010	spleetlamponderzoek	34
120010	1dd	50
120010	AO	34
120010	cornea	50
120010	aneurysmata	16
120010	mydriasis	21
120010	PTA	16
120010	bifemorale	15
120010	proximaal	55
120010	bleb	22
120010	ODS	49
120010	FFXO	13
120010	cataractoperatie	31
120010	GPA	51
120010	AFC	42
120010	OSec	50
120010	ge-exaveerd	20
120010	TE	48
120010	occlusie	80
120010	miosis	30
120010	claudicatio intermittens	21
120010	CD-ratio	54
120010	OD	51
120010	carotis	21
120010	ODec	51
120010	iliacaal	19
120010	papil	89
120010	perifeer	88
120010	stenose	18
120010	anamnese	26
120010	OS	52
120010	conjunctiva	20
120011	valsalva	13
120011	laparotomie	7
120011	ileus	9
120011	dorsale	0
120011	m.n.	38
120011	ventrale	0
120011	NTX	41
120011	fam	86
120011	fossa	0
120011	mediane	0
120011	informed consent	1
120011	symptomatisch	7
120011	tractus digestivus	1
120011	tractus urogenitalis	1
120011	li flank	26
120012	N. tibialis posterior	0
120012	atrofi interosseii
120012	mandibula	0
120012	nervus axillaris links	16
120012	polsbuigers	26
120012	Immuun serologie	17
120012	N. peroneus	21
120012	discopathie	0
120012	APB 1/3	4
120012	atrofie interosseii L>R	4
120012	Polsstrekkers 5/2	29
120012	HNP	0
120012	CWK	0
120012	parese interosseii 3-4/4	11
120012	N. medianus	27
120012	neuron	18
120012	plexus	0
120012	vetsignaal	11
120012	anti-GM1 (IgG) neg	0
120012	polsstrekkers
120012	discusbulging	0
120012	N. suralis	18
120012	kPa	1
120012	perifere zenuw	16
120012	geëlongeerde aorta thoracalis	0
120012	vingerbuigers 5/3	31
120012	parese TA,/EHL	8
120012	plexus brachialis	0
120012	fibulakop	1
120012	vigoriemeter	91
120012	distaal	0
120012	kanaalstenose	61
120012	N. ulnaris	25
120012	multinodulaire	0
120012	CMMN	7
120012	nervus axilaris	14
120012	anti-GM1-, echo	20
120012	anti-GM1-
120012	Auto antistoffen	31
120012	vingerbuigers
120012	proximaal	15
120012	sulcus	24
120012	paraneopl.	0
120012	parese interesseii
120012	dentogeen	0
120012	pathologische aankleuring	9
120012	Neuronaalanti-GM1 (IgM) neg	0
120013	pdr	7
120013	VC 6 mnd	11
120013	varices	8
120013	cardiaal	8
120013	osteopenie	9
120013	pulmonaal	8
120013	st na appendecomtie	9
120013	blanco	8
120013	intravasale hemolyse	5
120013	foutief verhoogd door hemolytisch monster	6
120013	eGFR (CKD-EPI)	5
120013	tonsillectomie	9
120013	pos (neg)	9
120013	ImmunoglobulineM-proteïne	7
120013	rugstimulator	30
120013	MGUS: jaarlijks vervolgen YYYY, laatste keer afwezig	8
120013	verwuhzin	8
120013	st na	9
120013	mammae	59
120013	Immuun serologie	5
120014	synacthen	49
120014	kernset	91
120014	microcytair	49
120014	hyperlipidemie	48
120014	U-prevent	47
120014	ischemie	51
120014	ostepenie	49
120014	hba1c	92
120014	retinopathie	50
120014	steroidgeinduceerde	93
120014	SR	52
120015	Bimalleolaire	6
120015	revascularisatie	7
120015	stp	10
120015	devieert	7
120015	type A (OSA)	6
120015	PPV	5
120015	vibratiezin	52
120015	ug	65
120015	beenmergaspiraat	81
120015	quadriceps	54
120015	consolidatie	35
120015	cerebellaire TIA	31
120015	proliferatieve	43
120015	ET	9
120015	25g	11
120015	mec	9
120015	plantair	21
120015	Cave	7
120015	eversie	4
120015	hallux	7
120015	inversie	5
120015	BSG	7
120015	transluminale	6
120015	PEG	6
120015	PCI RCA	3
120015	OSG	4
120015	fakie	37
120015	ntb	99
120015	iliopsoas	4
120015	MPN	7
120015	MRC	4

## Sheet: Clarifications
Var1	Freq	Uniq	definition
aambeien	1	1	gezwollen bloedvaten in de wand van de endeldarm, net boven de anus- ze kunnen jeuken, een branderig gevoel geven of pijn doen
aankomen	1	1	toename van lichaamsgewicht
acromegalie	1	1	overproductie van groeihormoon door een aandoening van de hypofyse, leidend tot overmatige groei van lichaamsuiteinden (neus, onderkaak, handen en voeten), verkromming van de wervelkolom en vergroting van de ingewanden
actinische keratosen	1	1	kleine, vaak ruw aanvoelende verhoornde plekjes van de huid die met name ontstaan op plekken die veel aan de zon zijn blootgesteld, door schade van het ultraviolette licht
aders	1	1	bloedvaten waarin bloed naar het hart toestroomt
afvallen	1	1	het verminderen van lichaamsgewicht door een dieet, lichaamsbeweging, medische ingreep of ziekte
afwachtend beleid	1	1	het verloop van een ziekte nauwkeurig volgen met regelmatige controle-onderzoeken om bij eventuele veranderingen (verslechtering) de behandeling bij te stellen of een behandeling, al dan niet palliatief, te starten
allergieën	1	1	bijzondere, meestal heftige reactie van het afweersysteem van het lichaam op bepaalde stoffen of prikkels
alvleesklier	1	1	orgaan dat achter de maag ligt en hormonen produceert en een sap dat van belang is voor de spijsvertering
alvleesklierontsteking	1	1	ontsteking van de alvleesklier
amputaties	2	2	het operatief verwijderen van een lichaamsdeel
anaal	1	1	de anus betreffend of via de anus- anale fissuren zijn anuskloofjes- als een medicijn via de anus moet worden toegediend, heet dat meestal niet anaal maar rectaal- rectaal komt van endeldarm, maar een medicijn dat rectaal moet worden toegediend, komt dus via de anus in de endeldarm en wordt daar opgenomen in de rest van het lichaam
anamnese	10	9	voorgeschiedenis- het totaal aan gegevens dat een patiënt zich in een vraaggesprek met de arts over zijn klachten en algemene toestand kan herinneren- de anamnese omvat antwoorden op vragen over de hoofdklacht, de toestand van de diverse orgaansystemen en de psychische en de sociale omstandigheden
aneurysma	1	1	plaatselijke verwijding of uitstulping van een bloedvat of het hart als gevolg van een zwakte in de vaatwand, die bij scheuren snel tot een ernstige inwendige bloeding kan leiden
antibiotica	3	3	medicijnen die infecties door bacteriën voorkomen of genezen door de bacteriën te doden of af te remmen
antistoffen	2	1	stoffen in het lichaam die lichaamsvreemde stoffen zoals virussen en bacteriën onschadelijk maken
antistollingsmiddelen	1	1	medicijnen die ongewenste stolselvorming in het bloed voorkomen
aorta	3	3	grote lichaamsslagader die ontspringt aan de linkerhartkamer en het zuurstofrijke bloed uit het hart verdeelt over de rest van het lichaam
apneu	1	1	tijdelijke ademstilstand
artrose	1	1	chronische, niet door ontsteking veroorzaakte gewrichtsaandoening, waarbij verandering van het kraakbeen in de gewrichten leidt tot pijn en stijfheid- komt vooral voor bij ouderen
aspirine	1	1	merknaam van een pijnstiller met acetylsalicylzuur als werkzaam bestanddeel
baarmoeder	1	1	onderdeel van de vrouwelijke inwendige geslachtsorganen waarin de vrucht zich ontwikkelt
baarmoederkanker	1	1	kanker die ontstaat in het slijmvlies binnenin de baarmoederholte (endometriumkanker) of vanuit het bindweefsel of spierweefsel van de baarmoederwand (baarmoedersarcoom)
baarmoederverwijdering	2	2	operatieve verwijdering van de baarmoeder
balzak	1	1	huidzak bij de man die zaadballen, bijballen en zaadleiders bevat
beenmerg	1	1	weefsel in de mergholten van de botten waar bloedcellen en bloedplaatjes worden gemaakt
beenmergontsteking	1	1	ontsteking van het beenmerg, die zich meestal uitbreidt naar het bot en verdere omgeving
beenmergpunctie	1	1	onderdeel van een beenmergonderzoek waarbij met een holle naald cellen uit het beenmerg worden opgezogen voor weefselonderzoek
benauwdheid	1	1	toestand en gevoel van bemoeilijkte ademhaling
bestraling	1	1	behandeling van kwaadaardige tumoren door gebruikmaking van ioniserende straling- het DNA van de kankercellen raakt beschadigd, waardoor deze niet (goed) herstellen en/of in hun groei geremd worden
bijwerkingen	3	3	bijkomende effecten van medicijnen, medische behandelingen of gebruik van medische hulpmiddelen
bindvlies	2	2	slijmvlies dat de binnenzijde van de oogleden en de voorzijde van de oogbol bekleedt
biopsie	1	1	het weghalen voor diagnostisch onderzoek van een stukje weefsel uit het lichaam met een dikke, holle naald of een tang
blaas	1	1	orgaan waarin urine verzameld wordt
blindedarmoperatie	1	1	verwijdering van de blindedarm bij blindedarmontsteking
bloed	3	2	lichaamsvloeistof bestaande uit plasma waarin zich de bloedcellen bevinden en verder alle voedings- en afvalstoffen van het organisme
bloedarmoede	3	3	tekort aan rode bloedlichaampjes in het bloed
bloeddruk	2	2	druk die het bloed op de binnenwand van de slagaders uitoefent
bloedgroepen	1	1	vier groepen waarin mensen kunnen worden ingedeeld op grond van bepaalde eigenschappen van de rode bloedcellen, A, B, AB en 0
bloedingen	3	3	verlies van bloed, zoals bij bloeduitstortingen, slagaderlijke bloedingen enz.
bloedplaatjes	4	4	bloedcellen zonder kern die een rol spelen bij de bloedstolling
bloedplassen	1	1	het uitplassen van urine waarin zich bloed bevindt
bloedsuikerspiegel	1	1	gehalte aan glucose in het bloed
bloeduitstortingen	1	1	bloedingen waarbij het bloed niet buiten het lichaam komt en zich op een bepaalde plek ophoopt, bijvoorbeeld onder de huid
borsten	1	1	welvingen gevormd door de borstklieren van de vrouw
borstvorming bij mannen	1	1	het ontstaan van borsten bij mannen- dit kan onder andere komen door veel vetafzetting, door hormonale veranderingen, als bijwerking van medicijnen, bij hormoonproducerende gezwellen of borstkanker- maar vaak kan er geen oorzaak worden gevonden
botbreuken	2	2	breuken in het bot, uiteenlopend van een scheurtje in het bot tot een volledige verbrijzeling
botkanker	1	1	kwaadaardig gezwel dat is ontstaan uit bot of kraakbeen, meestal van de ledematen
botontkalking	1	1	vermindering van botweefsel, waardoor de botten broos worden en gemakkelijker breken
bradycardie	1	1	(abnormaal) trage hartslag door een vertraging of blokkade van de elektrische prikkels in het hart
buik	4	4	deel van de romp tussen middenrif en bekken
burn-out	1	1	verschijnsel van emotionele uitputting, depersonalisatie en een gevoel van verminderde persoonlijke bekwaamheid ten gevolge van langdurige overbelasting op het werk
cardiologen	2	2	medisch specialisten (internisten) die gespecialiseerd zijn in de behandeling van hart- en vaatziekten
cardiologie	1	1	medisch specialisme dat zich bezighoudt met onderzoek en behandeling van hart- en vaatziekten
chemotherapie	1	1	medische behandeling tegen kanker, gebaseerd op toediening van cytostatica, medicijnen die kankercellen vernietigen en voorkomen dat deze zich verder delen
chirurgen	3	3	medisch specialisten die onder meer verwondingen, tumoren en infecties behandelen met operatieve ingrepen
chirurgie	3	3	medisch specialisme dat zich voornamelijk bezighoudt met operatieve ingrepen
chlamydia	1	1	seksueel overdraagbare aandoening die overgebracht wordt door de bacterie Chlamydia trachomatis- kan leiden tot onvruchtbaarheid bij vrouwen en buitenbaarmoederlijke zwangerschappen
cholesterol	4	3	vetachtige stof die in het lichaam voorkomt en nodig is voor de spijsvertering, de opbouw van lichaamscellen en de productie van hormonen
cholesterolverlagers	1	1	medicijnen die het cholesterolgehalte in het bloed verlagen
coloscopie	1	1	kijkonderzoek van de dikke darm, waarbij de arts de binnenwand van de dikke darm bekijkt via een flexibele kijker met een lampje, een colonoscoop
colostoma	1	1	kunstmatige uitgang van de dikke darm
corticosteroïden	1	1	1. hormonen die van nature in de bijnierschors worden gemaakt 2. groep van medicijnen die zijn afgeleid van bijnierschorshormonen- ze remmen ontstekingen, maar verlagen tevens de afweer tegen ziektekiemen- toegepast bij onder meer de behandeling van allergieën, ontstekingen, afstotingsreacties en uitval van de bijnieren
cortisol	2	2	subgroep binnen de corticosteroïden- hormonen die een belangrijke functie hebben bij het reguleren van het immuunsysteem, versterkt worden afgegeven bij stress en ontstekingsreacties onderdrukken- als geneesmiddel ook bekend als cortison of hydrocortison
cross-overtransplantatie	1	1	transplantatie waarbij een bekende (emotioneel verbonden) donor een orgaan doneert aan een onbekende, waarbij er in ruil een orgaan beschikbaar komt van een donor die beter matcht met de ontvanger dan de eerste donor
cutaan	2	2	de huid betreffend of via de huid- een cutaan lymfoom is een huidlymfoom en een medicijn dat cutaan moet worden toegediend, moet op de huid worden gesmeerd of wordt bijvoorbeeld via een pleister op de huid in het lichaam opgenomen
cysten	1	1	holtes in het lichaam gevuld met vocht
dagbesteding	1	1	activiteiten die zowel residentieel als ambulant kunnen zijn en een recreatief, therapeutisch of arbeidsmatig karakter hebben
darmafsluiting	3	2	belemmering van de passage door de darm, waardoor een stuk van de darmwand kan afsterven en darminhoud naar de buikholte kan lekken, waarna buikvliesontsteking ontstaat
depressie	2	2	periode van verlaagde gemoedsstemming, gekenmerkt door onder meer verlies van interesse of plezier in activiteiten, minder energie, slapeloosheid, verminderd gevoel van eigenwaarde en zelfvertrouwen
diabetes	4	3	ziekte waarbij door een tekort aan de stof insuline er te veel glucose (suiker) in het bloed komt
diabetische retinopathie	1	1	afwijking aan het netvlies die voorkomt bij mensen met suikerziekte (diabetes mellitus)
diagnostiek	6	5	methoden en technieken om een ziekte of probleem te kunnen vaststellen
dialyse	1	1	het zuiveren van het bloed van afvalstoffen, overtollig zout en vocht bij sterk verminderde of afwezige nierfunctie via een kunstnier of via het buikvlies
diarree	1	1	veelvuldige heel zachte tot waterdunne ontlasting
diëten	1	1	speciaal samengesteld geheel van voedingsstoffen dat iemand met een bepaald doel tot zich neemt, bijvoorbeeld om af te vallen, aan te komen, of omdat hij bepaalde voedingsstoffen niet wenst te eten of kan eten, zoals eiwitdiëten, glutenvrije diëten, dieetvoeding, zoutarme diëten of diëten waarbij iemand juist veel of weinig koolhydraten neemt
diëtisten	1	1	beroepskrachten in de individuele gezondheidszorg met als taken het geven van adviezen over voeding en de samenstelling van iemands dagelijkse maaltijden en het toezicht houden op dieetkeukens
dikke darm	1	1	deel van de darmen tussen het einde van de dunne darm en de anus, bestaande uit de blindedarm, de dikke darm in engere zin en de endeldarm
dikkedarmontsteking	1	1	ontsteking van het slijmvlies van de dikke darm of van de endeldarm
discopathie	1	1	uitpuiling of uitstulping van een tussenwervelschijf in de wervelkolom als gevolg van slijtage, zonder druk op de zenuwbaan
donatie	1	1	het afstaan van organen, weefsel, bloed of plasma om bij een ander mens te gebruiken
donors	1	1	mensen die zich bereid hebben verklaard om een orgaan of lichaamsweefsel af te staan voor de genezing van anderen
draaiduizeligheid	1	1	gevoel dat de patiënt zelf of zijn omgeving draait, als gevolg van een evenwichtsstoornis
drainage	1	1	het afvoeren van overmatig lichaamsvocht, zoals wond- of weefselvocht of bloed, door een buisje (drain), dat operatief in het lichaam aangebracht is- onder meer na operaties en bij ernstige wonden of ontstekingen
duizeligheid	3	2	gevoel van onvast zijn, zoals draaiduizeligheid, bewegingsonzekerheid of licht gevoel in het hoofd- veelal gepaard gaande met valneiging, waarbij de lijder de indruk heeft dat hijzelf of de omgeving wankelt, draait of wegzakt
dysplasie	1	1	abnormale vorming en groei van weefsels
dystrofie	1	1	groeistoornis of degeneratie van organen, weefsels en cellen door voedingsstoornissen
echo	3	3	onderzoek waarbij met geluidsgolven een deel van het lichaam in beeld wordt gebracht
eczeem	1	1	niet-infectieuze ontstekingsreactie in de huid die gepaard kan gaan met jeuk, roodheid, kleine bultjes, blaasjes waar vocht uitkomt en schilfering
eileiderverwijdering	1	1	operatie waarbij één of beide eileiders verwijderd worden, onder meer bij een buitenbaarmoederlijke zwangerschap of eierstokkanker
eiwitten	5	4	chemische verbindingen die in levende organismen voorkomen en bestaan uit ketens van aminozuren- eiwitten komen ook in voedingsstoffen voor onder meer in vlees, vis, eieren, zuivelproducten, peulvruchten, gevogelte en noten
endeldarm	1	1	laatste deel van de dikke darm
endeldarmkanker	1	1	kwaadaardig gezwel in het rectum, de laatste 15 cm van de dikke darm, dat vaak ontstaat vanuit een adenomateuze poliep
endocrinologen	3	3	internisten die mensen met stoornissen in de klieren onderzoeken en behandelen
endocrinologie	8	7	specialisatie binnen de interne geneeskunde gericht op onderzoek en behandeling van stoornissen van de klieren
erfelijkheid	1	1	van generatie op generatie overgaan van lichamelijke of geestelijke eigenschappen, zoals (mogelijke) genetische aanleg voor beperkingen, ziekten of aandoeningen
essentiële tremor	1	1	het trillen van een of meer lichaamsdelen, zonder duidelijke oorzaak
etalagebenen	1	1	pijn en/of kramp door onvoldoende bloedtoevoer in de beenspieren ten gevolge van vaatvernauwing waardoor men regelmatig moet stoppen met lopen
fibromyalgie	1	1	vorm van reuma met als kenmerken chronische pijn en stijfheid, vooral in de spieren, pezen en banden, en vermoeidheid
foliumzuur	1	1	vitamine die vooral voorkomt in groene groenten, fruit, volkoren producten en in mindere mate in melk en melkproducten- speelt een belangrijke rol bij de vorming van rode bloedcellen en van het DNA en bij de celdeling tijdens groei- inname van extra foliumzuur voor en in het begin van de zwangerschap verlaagt de kans op spina bifida (open rug)
fosfaten	1	1	mineralen die samen met calcium stevigheid geven aan de botten- als de nieren niet goed werken, kan fosfaat zich ophopen en leiden tot botproblemen en verkalking van bloedvaten- bij ophoping onder de huid kan fosfaat tot jeuk leiden
fysiotherapie	2	2	paramedische zorg die bestaat uit behandeling met massagetechnieken, bewegingstechnieken en fysiotechniek (behandeling met ultrageluid, stroom, warmte en kou) voor mensen met klachten of belemmeringen in het houdings- en bewegingsapparaat
genitale wratten	2	1	wratjes op de geslachtsdelen
gewrichtspijn	1	1	pijn, stijfheid en stramheid in een gewricht door overbelasting, slijtage of een ontsteking
glasvochtbloeding	2	1	bloeding in de geleiachtige substantie die de achterkant van het oog vult als gevolg van gesprongen bloedvaatjes in het netvlies of vaatvlies
glasvochtverwijdering	2	1	operatieve verwijdering van het glasvocht uit een oog en vervanging daarvan door een andere stof, zoals water, olie, lucht of een bepaald gas
glaucoom	1	1	verzamelnaam voor oogaandoeningen veroorzaakt door verhoogde druk in de oogbol waardoor delen van het netvlies afsterven en het gezichtsveld gedeeltelijk uitvalt
glaucoomoperaties	1	1	operatieve ingrepen om chronisch glaucoom te behandelen- door het vocht af te voeren wordt de druk in het oog verlaagd
glucose	4	4	een van de suikers die noodzakelijk is als energiebron voor de cellen in het lichaam
gordelroos	1	1	huidziekte, veroorzaakt door het virus dat ook waterpokken veroorzaakt, met als kenmerken pijn, roodheid en groepsgewijze blaasjes op de huid- de symptomen blijven beperkt tot een helft van het lichaam
gynaecologen	2	2	medisch specialisten die zich bezighouden met onderzoek naar en zorg bij gynaecologische aandoeningen (vrouwenziekten) en zorg rondom zwangerschap en bevallingen
hart	1	1	orgaan dat het bloed door het bloedvatenstelsel pompt
hartaanval	1	1	het afsterven van een deel van de hartspier door onvoldoende toevoer van zuurstofrijk bloed
hartfalen	1	1	het niet goed werken van het hart, waardoor er te weinig bloed wordt rondgepompt naar de weefsels om in de zuurstofbehoefte te voorzien
hartritmestoornissen	1	1	stoornissen in de regelmaat of frequentie van het normale hartritme- het hart kan overslaan, onregelmatig gaan kloppen, te langzaam kloppen of op hol slaan
hartruis	1	1	ruisend geluid dat een arts via een stethoscoop kan waarnemen tussen de normale harttonen in, veroorzaakt door turbulentie van het bloed door onder meer hartklepafwijkingen of een gaatje tussen de hartkamers- kan ook onschuldig zijn, zonder hartafwijking, bijvoorbeeld bij jonge kinderen of na grote inspanning
hematologie	3	3	onderdeel van de interne geneeskunde dat het bloed en de bloedbereidende organen en hun ziekten bestudeert
hersenvliesontsteking	1	1	verzamelnaam voor verschillende soorten infecties van de hersenvliezen en/of de ruggenmergvliezen
herstel	1	1	proces waarbij mensen in een betere lichamelijke of psychische conditie raken bij een ziekte of na een operatie of ongeval door vermindering of het voorbijgaan van klachten en/of het persoonlijke proces van mensen met psychische kwetsbaarheid waarin zij de draad weer oppakken en hun leven nieuwe vorm en inhoud geven
heupen	4	4	overgang tussen de romp en de benen
hiv-infectie	1	1	besmetting met het human immuno deficiency virus wat aids veroorzaakt- kan onder meer ontstaan door bloed, sperma of vaginaal vocht op beschadigde huid, bloedtransfusies met besmet bloed, besmette naalden en spuiten, onveilige seks
hoge bloeddruk	4	4	te hoge druk die het bloed op de binnenwand van de bloedvaten uitoefent, waardoor de kans op hart- en vaatziekten toeneemt
hoornvlies	2	2	doorzichtige, voorste deel van de wand van de oogbol
huidartsen	1	1	medisch specialisten die gespecialiseerd zijn in onderzoek en behandeling van huidaandoeningen en seksueel overdraagbare aandoeningen
huidbiopsie	1	1	onderzoek waarbij wat huidweefsel wordt weggenomen om te onderzoeken, bijvoorbeeld op de aanwezigheid van kankercellen
huiduitslag	1	1	plaatselijke verandering van de huid, zoals vlekken, pukkeltjes, blaasjes en korstjes, veroorzaakt door een ziekte of afwijking of door externe factoren als virussen, bacteriën, schimmels en allergenen
hydronefrose	1	1	uitzetting van de nier door een verstopping in de urinewegen
hyperacusis	1	1	aandoening aan het gehoororgaan, waardoor wisselende geluidssterkten niet goed kunnen worden waargenomen- leidend tot overgevoeligheid voor geluid
hyperseksualiteit	1	1	sterker ontwikkelde of meer tot uiting komende seksuele gevoelens (libido) dan in de samenleving als normaal of wenselijk wordt beschouwd
hyperthyreoïdie	1	1	overmatige werking van de schildklier, waardoor deze te veel schildklierhormonen afscheidt
ic-verpleegkundigen	1	1	specialistisch verpleegkundigen die mensen verzorgen en verplegen die op de intensive care liggen
ijzer	1	1	scheikundig element- een zeer zacht, zilverwit metaal
ileostoma	1	1	kunstmatige uitgang van de dunne darm
immunofenotypering	1	1	diagnostisch onderzoek waarmee de verhouding tussen verschillende soorten witte bloedcellen en de rijping in kaart gebracht kunnen worden door gebruikmaking van fluorescerende antistoffen die zich aan de cellen hechten- toegepast bij de diagnose en behandeling van kwaadaardige bloedziekten als leukemie en lymfomen en stoornissen in het afweersysteem
implantatie	1	1	het aanbrengen van lichaamsvreemd materiaal in het lichaam, bijvoorbeeld kunstheupen, kunststofhartkleppen of kunstmatige wortels in het kaakbot
incontinentie	1	1	ongewild verlies van urine of ontlasting
infecties	4	4	plaatselijke reacties in het lichaam door micro-organismen
infectieziekten	1	1	plaatselijke ontstekingen of ziekten van het gehele organisme veroorzaakt door parasieten, schimmels, bacteriën of virussen
informed consent	1	1	het recht van een patiënt op informatie van de behandelend arts over zijn ziekte, mogelijke behandelingen en de risico&apos-s of bijwerkingen van de behandeling(en) en het recht om vervolgens zelf te beslissen of en welke behandeling hij wil ondergaan- zonder toestemming van de patiënt, de informed consent, mag een arts de behandeling niet uitvoeren
infuus	1	1	1. apparaat waarmee vloeistof langzaam in een bloedvat van een patiënt wordt toegediend 2. medische behandeling waarbij medicijnen, vocht of voeding via een infuus worden toegediend
injecties	2	2	toediening van opgeloste middelen met behulp van een spuit voorzien van een holle naald, waardoor de vloeistof in het lichaam wordt gebracht
insuline	1	1	hormoon dat in de eilandjes van Langerhans in de alvleesklier geproduceerd wordt en dat invloed heeft op de suikerstofwisseling- een tekort aan insuline leidt tot suikerziekte
intake	1	1	oriënterend gesprek tussen cliënt en dienstverlenende organisatie, volgend op een aanmelding, waarin op een zo eenduidige en objectief mogelijke wijze de noodzaak van hulp vastgesteld wordt- tevens wordt de aard, omvang en urgentie van de aan te bieden hulp bepaald
interferon	1	1	verzamelnaam voor eiwitten die door cellen worden gevormd als reactie op virusinfecties- ook een geneesmiddel
interne geneeskunde	1	1	medisch specialisme gericht op onderzoek en behandeling van ziekten de geheel of gedeeltelijk te maken hebben met de inwendige weefsels (inclusief bloed) en organen
internisten	6	6	medisch specialisten die zich bezighouden met onderzoek en behandeling van ziekten die geheel of gedeeltelijk te maken hebben met de inwendige weefsels (inclusief bloed) en organen
intraveneus	2	2	in de aders- intraveneuze injecties zijn injecties die in een ader worden gegeven
jeuk	1	1	kriebelend gevoel aan de oppervlakte van de huid dat aanzet tot krabben
kaak	1	1	deel van de schedel dat bestaat uit twee botstukken waarin de tanden en kiezen geplaatst zijn
kalium	2	2	scheikundig element- een zilverwit, zeer reactief alkalimetaal
kalk	4	4	scheikundig element- een lichtgeel metaal
kanker	2	2	vorming van kwaadaardige gezwellen
keelamandelen verwijderen	1	1	het operatief verwijderen van de keelamandelen
klaplong	1	1	aanwezigheid van lucht in de borstholte buiten de longen, waardoor de long geheel of gedeeltelijk dichtklapt
klieren	2	2	organen die een bepaalde stof afscheiden, zoals traanvocht, melk, zweet, speeksel, maagsap, darmsap of hormonen
koorts	1	1	lichaamstemperatuur boven de 38 graden Celsius, verschijnsel bij infectieziekten en ontstekingsprocessen
krampen	2	2	krampachtige, pijnlijke en onwillekeurige samentrekking van spieren
kwaliteit van leven	2	2	de door mensen zelf ervaren kwaliteit van hun leven die wordt bepaald door fysieke, psychische en sociale factoren, zoals door persoonlijke kenmerken, de kwaliteit van relaties, geestelijk evenwicht, de vervulling van levensdoelen, de mate van aanpassing aan de ontstane situatie in geval van ziekte, beperking of ouderdom, en maatschappelijke participatie- primair is kwaliteit van leven een subjec…
laboratoria	3	3	werkplaatsen voor onderzoek of voor bereiding van stoffen- het kan gaan om medisch onderzoek, technisch onderzoek of wetenschappelijk onderzoek
labuitslagen	1	1	uitkomsten van laboratoriumonderzoek
lage bloeddruk	1	1	bloeddruk die lager is dan de normale bloeddruk van 110/70 bij mannen en 100/60 bij vrouwen (het eerste getal geeft de bovendruk aan, het tweede getal de onderdruk)- kan duizeligheidsklachten en flauwvallen veroorzaken
lasertherapie	1	1	behandeling met laserstralen, waarbij zeer sterke, smalle lichtbundels worden gebruikt om weefsel te vernietigen, door te snijden of juist aan elkaar te hechten- onder meer toegepast in de oogheelkunde en bij verschillende vormen van kanker
ledematen	1	1	de armen en benen van een mens
leefstijl	1	1	persoonlijke manier van leven die beïnvloed wordt door iemands cultuur, levensloop, persoonlijke geschiedenis en opvattingen
lendenwervels	1	1	vijf wervels van de wervelkolom die tussen de borstwervels en het heiligbeen in zitten- de lendenwervels worden weergegeven als L1 tot en met L5, waarbij L1 de bovenste is, onder de borstwervels- de L staat voor lumbaal, dat is met betrekking tot de lendenen
lever	2	2	groot orgaan dat rechtsboven in de buik ligt en waarin veel stoffen worden aangemaakt (onder meer gal en bloedeiwitten), afgebroken (onder meer fructose en aminozuren) en opgeslagen (onder meer glucose en ijzer)
lichaamsbeweging	3	3	bewegingsoefeningen in de zin van vrijetijdsbesteding of gezondheidsbevordering
lichamelijk onderzoek	7	7	onderdeel van het diagnostische proces, naast de anamnese, waarbij de arts uitwendig onderzoek verricht aan het hele lichaam of bepaalde onderdelen van het lichaam van de patiënt, door het lichaam te bekijken, te betasten, te beluisteren en/of te bekloppen
littekenbreuk	2	1	uitpuiling van het buikvlies en soms ook van buikorganen via een zwakke plek in een litteken in de buikwand- het litteken is een overblijfsel van een operatie in de buik
littekens	2	1	overblijvende afwijkingen van de huid na de genezing van een wond- ook de vorming van inwendig littekenweefsel na een operatie
longemfyseem	1	1	aandoening van de luchtwegen met afwijkingen in de kleinere luchtwegen, het longweefsel en de bloedvaten van de longen- vooral de longblaasjes raken in de loop der jaren beschadigd
longfibrose	1	1	zeldzame longziekte waarbij bindweefsel in de wand van de longblaasjes wordt gevormd
longfoto	2	2	medisch onderzoek waarbij een röntgenfoto van de borstkas wordt gemaakt om longaandoeningen, hartaandoeningen of botafwijkingen op te sporen
longontsteking	1	1	infectie van de kleinere luchtwegen (bronchiën) en de longblaasjes, die meestal ontstaat na een verkoudheid of griep
longtransplantatie	1	1	transplantatie van een of twee longen van een overleden donor, of van een deel van een long (longkwab) van een levende donor, naar een longpatiënt met een ernstige longaandoening in een eindstadium waarvoor geen andere behandeling meer mogelijk is
m-proteïne	1	1	abnormale antistof die geproduceerd wordt door bepaalde plasmacellen- het eiwit zorgt ervoor dat het bloed stroperiger wordt (hyperviscositeit)- komt voor bij kankersoorten als multipel myeloom en ziekte van Waldenström, maar soms ook zonder dat er sprake is van een tumor
maagverkleining	1	1	operatie waarbij de inhoud van de maag verkleind wordt- wordt toegepast bij mensen met ernstig overgewicht
medicijnen	8	8	natuurlijke of synthetische stoffen die in de gezondheidszorg gebruikt worden om klachten te behandelen of om ziekten te genezen of te voorkomen- worden soms ook gebruikt om een diagnose te kunnen stellen
medicijntoediening	1	1	het toedienen van medicijnen aan patiënten of cliënten als zij niet zelf de verantwoordelijkheid kunnen dragen voor het juist en tijdig innemen, aanbrengen of inbrengen van hun medicijnen- onder medicijntoediening vallen naast het toedienen van medicijnen ook taken als het aanreiken, klaarzetten en beheren van de medicijnen
metformine	2	1	bloedsuikerverlagend medicijn dat vaak wordt gebruikt in de behandeling van diabetes type 2- het medicijn zorgt ervoor dat de lever minder insuline aanmaakt en dat de gevoeligheid voor insuline van de spieren toeneemt en suiker beter opgenomen kan worden
middenrifbreuk	1	1	uitpuiling van de maag in het middenrif waardoor het sluitspiertje tussen maag en slokdarm minder goed sluit en eten uit de maag terugvloeit in de slokdarm
misselijkheid	1	1	onaangenaam gevoel in de maag waarbij de neiging tot braken kan ontstaan of bestaat
mrsa	2	1	multiple resistant Staphylococcus aureus- bacterie die resistent is tegen diverse soorten antibiotica- veel voorkomende verwekker van ziekenhuisinfecties
natrium	1	1	scheikundig element- een zacht, wit alkalimetaal
nefrologen	1	1	internisten die gespecialiseerd zijn in nieraandoeningen
nefrologie	2	2	medisch specialisme dat zich bezighoudt met onderzoek en behandeling van nieraandoeningen
nefrotisch syndroom	1	1	combinatie van ziekteverschijnselen die te maken hebben met niet goed functionerende nierfilters waardoor eiwitverlies via de urine optreedt- het eiwitverlies leidt tot een te laag eiwitgehalte in het bloed, tot vochtophoping en een te hoog vetgehalte in het bloed
neurologen	4	3	medisch specialisten die gespecialiseerd zijn in de neurologie
neurologie	2	2	medisch specialisme dat zich bezighoudt met hersen-, ruggenmerg- en zenuwaandoeningen
neurologisch onderzoek	1	1	lichamelijk onderzoek naar het functioneren van de hersenen waarbij wordt gecontroleerd of de hersenen het lichaam nog goed besturen en of er nog andere problemen zijn met functies die in de hersenen worden geregeld, zoals zien, praten, evenwicht, geheugen, concentratie of denken
neuropathie	4	4	aandoening van een of meer zenuwen
nieraandoeningen	2	2	ziekten aan één of beide nieren- kunnen aangeboren zijn maar ook later ontstaan
nierfunctie	1	1	werking van de nieren- als de nieren minder goed werken, is er sprake van nierschade
nierschade	2	2	onvoldoende werking van de nieren- bij zeer slecht functioneren van beide nieren (meer dan 90 procent functieverlies) is een nierfunctievervangende behandeling nodig (dialyse of transplantatie)
niertransplantatie	2	2	transplantatie van een nier van een overleden donor of een levende donor, bij voorkeur een familielid van de patiënt, naar een patiënt die zonder donornier op nierdialyse is aangewezen of dat zal zijn
normaalwaarden	1	1	waarden waarmee de uitslag van iemands medisch onderzoek, zoals een bloedonderzoek of longfunctieonderzoek, worden vergeleken- de normaalwaarden bestaan uit een interval en geven aan of een uitslag als normaal of als afwijkend kan worden beschouwd- bijvoorbeeld een waarde tussen 8,5 en 11 mmol per liter bloed voor hemoglobine (Hb) is normaal voor mannen
oncologen	1	1	internisten die gespecialiseerd zijn in onderzoek en behandeling van mensen met kanker
oncologie	1	1	specialisatie binnen de interne geneeskunde gericht op onderzoek en behandeling van kanker
onrust	1	1	rusteloze gemoedstoestand
oogartsen	1	1	medisch specialisten die gespecialiseerd zijn in onderzoek en behandeling van ziekten, afwijkingen en beschadigingen van het oog
ooglidontsteking	1	1	ontsteking van de ooglidrand
oogspiegelen	1	1	test om met behulp van een instrument (oogspiegel) de binnenkant van het oog te onderzoeken
oorsuizen	2	2	het horen van geluiden (zoals brommen, fluiten en windgeruis) die niet van buitenaf komen
openbuikoperaties	2	1	buikoperaties waarbij de buik geopend wordt met een grote snee in de buikwand, dit in tegenstelling tot een kijkoperatie (laparoscopische operatie)
operaties	5	4	chirurgische ingrepen, waarbij vaak een opening in het lichaam wordt aangebracht, maar waarbij ook gebruikgemaakt kan worden van bestaande lichaamsopeningen veelal onder steriele omstandigheden, al dan niet met behulp van een narcose of andere vorm van verdoving
operatieve verwijdering	4	4	operatieve ingreep waarbij iets uit het lichaam verwijderd wordt, zoals een orgaan, een stuk weefsel, een tumor
oraal	5	5	de mond betreffend of via de mond- een orale mucositis is een ontsteking van het slijmvlies in de mondholte en een medicijn dat oraal moet worden ingenomen, moet worden doorgeslikt
overgang	1	1	periode waarin de menstruatiecyclus bij de vrouw geleidelijk aan ophoudt
overgeven	1	1	het opgeven van de maaginhoud via slokdarm en mond
overgewicht	1	1	lichaamsgewicht dat boven het gezonde gewicht ligt- voor volwassenen bij een BMI (body mass index) groter dan 25- voor kinderen en jongeren zijn andere criteria omdat zij nog in de groei zijn, zo ligt bijvoorbeeld de grens bij 5-jarigen op een BMI van 17,4 voor jongens en 17,2 voor meisjes, voor 10-jarigen op een BMI van 19,8 voor jongens en 19,9 voor meisjes
overmatige slaperigheid	1	1	extreme slaperigheid overdag gedurende ten minste een maand, die in significante mate lijden veroorzaakt of beperkingen in het sociaal of beroepsmatig functioneren of het functioneren op andere belangrijke terreinen
overspannenheid	1	1	psychische en lichamelijke klachten door langdurende overbelasting
pacemaker	2	1	apparaten voor de behandeling van bepaalde hartritmestoornissen- dienen het hart kunstmatig prikkels toe
paracetamol	1	1	pijnstillend en koortsverlagend middel dat ook zonder recept bij de drogist te koop is
pijncentra	2	2	kenniscentra waarin verschillende disciplines samenwerken om chronische pijn te bestrijden
plaatselijke verdoving	1	1	vorm van verdoving bij kleine ingrepen waarbij de te behandelen plaats verdoofd wordt via een injectie dicht bij de plek
plaque	2	2	wittige, kleverige substantie op de tanden en kiezen waarin levende en dode bacteriën, losgelaten weefselcellen en voedselresten voorkomen
plasbuis	1	1	gedeelte van de urinewegen dat de urine van de blaas naar buiten brengt
plasmiddelen	1	1	medicijnen die de vorming van urine door de nieren bevorderen- gebruikt bij sommige nieraandoeningen, ter verlaging van de bloeddruk en bij behandeling van hartfalen
plassen	2	2	het lozen van urine
plexus	1	1	netwerk van zenuwen, aders of slagaders
plexus brachialis	1	1	vlechtwerk van zenuwen boven het sleutelbeen
poliklinieken	17	13	onderdelen van een ziekenhuis of andere zorgorganisatie waarin overdag onderzoek en behandeling plaatsvindt van aandoeningen en ziekten waarvoor specialistische kennis en hulpmiddelen nodig zijn- de zorg is geconcentreerd rond een bepaalde problematiek of een of meer specifieke ziekten
pulmonale hypertensie	1	1	te hoge bloeddruk in de longen
radioactief jodium	1	1	jodium dat wordt toegediend of waarmee de schildklier bestraald wordt voor diagnostische of therapeutische doeleinden bij een te snel werkende of vergrote schildklier of bij schildklierkanker
recidief	1	1	terugkeer van een ziekte die eerder weg was
rectaal	1	1	de endeldarm (rectum) betreffend of via de endeldarm- rectaal bloedverlies is bloedverlies vanuit de anus en een medicijn dat rectaal moet worden toegediend, moet in de endeldarm worden ingebracht, dus via de anus, zoals bij een zetpil of klysma
retinopathie	2	2	beschadiging van de kleine bloedvaten in het netvlies, die tot slechtziendheid kan leiden- kan onder meer bestaan uit het lekken van bloed uit beschadigde vaten, afsluiting, vermindering van de bloedtoevoer naar sommige gebieden en/of abnormale ontwikkeling van nieuwe bloedvaten
reumatologen	1	1	internisten die gespecialiseerd zijn in de behandeling van reumatische aandoeningen
reumatologie	1	1	medisch specialisme dat zich bezighoudt met onderzoek naar de oorzaken, het verloop en de behandeling van reumatische aandoeningen
revalidatie	1	1	medische zorg gericht op het herstellen na een ongeluk of operatie, zodat de patiënt weer zo goed mogelijk kan functioneren
rode bloedcellen	3	3	bloedcellen die zorgen voor het zuurstoftransport in het lichaam
schildklier	4	4	klier die aan de voorzijde van de hals voor en opzij van de luchtpijp, iets onder het strottenhoofd ligt en die schildklierhormonen afscheidt
schildklieroperatie	1	1	operatie waarbij de schildklier geheel of gedeeltelijk wordt verwijderd
schrompelnieren	1	1	te kleine nieren door het verschrompelen van het nierweefsel- hierdoor kunnen de nieren hun werk op een bepaald moment niet meer goed doen
sclerose	1	1	ziekelijke verharding van weefsel
screening	5	5	1. in de gezondheidszorg: vroegtijdige opsporing van risicofactoren voor ziekten om ziekten te voorkomen of vroegtijdige opsporing van ziekten om tijdig te kunnen behandelen en verergering van de ziekte zo veel mogelijk tegen te gaan 2. in de hulpverlening: systematisch nalopen van een aantal aandachtspunten om mogelijke problematiek vast te stellen, kan zowel gericht zijn op individuen als op gr…
serologie	2	2	onderzoek waarmee de aanwezigheid van antigenen of antistoffen tegen een ziekteverwekker in het bloed kan worden aangetoond
slagaders	1	1	bloedvaten waarin bloed van het hart af stroomt
sleutelbeen	1	1	gebogen beenstuk tussen borstbeen en schouderblad
slijm	1	1	stroperige vloeistof die wordt afgescheiden door de slijmklieren en die de slijmvliezen vochtig houdt
slijmvliezen	1	1	weefsels die bedekt zijn met een dun laagje slijm, bijvoorbeeld in de mond, neus, darm en vagina
slokdarmontsteking	1	1	ontsteking van het slijmvlies in de slokdarm door een schimmelinfectie of het terugstromen van maag- en galzuur in de slokdarm- veroorzaakt slikklachten en pijn achter het borstbeen
spataders	1	1	uitgezette, onder de huid gelegen kronkelende aders, waardoor de kleppen niet goed sluiten en bloed achterblijft- vaak in de benen
spierziekten	3	2	neuromusculaire aandoeningen, aandoeningen aan spieren en zenuwen
spijsvertering	2	2	proces waarmee door de mond opgenomen voedsel geschikt wordt gemaakt voor opname in het bloed en de restproducten worden uitgescheiden- het voedsel is dan verteerd
spijsverteringsstelsel	1	1	onderdelen in het lichaam die betrokken zijn bij de spijsvertering, van mond, keel, slokdarm, maag, galblaas, alvleesklier, lever, darmen tot anus
spleetlamponderzoek	2	2	oogonderzoek waarbij met behulp van een microscoop het voorste deel van het oog onderzocht wordt
sputum	1	1	vanuit longen en luchtwegen opgehoest slijmerig en etterig vocht
steenpuisten	1	1	rode, pijnlijke, met pus gevulde zwellingen in de huid, veroorzaakt door een bacteriële infectie
stoelgang	1	1	proces waarbij de ontlasting het lichaam verlaat, poepen
stofwisseling	1	1	totaal van chemische processen die zich in het lichaam afspelen
stoma	4	3	niet-natuurlijke opening die een lichaamsholte met de buitenwereld verbindt
stress	1	1	(te) veel lichamelijke en/of psychische spanning waardoor bepaalde klachten kunnen ontstaan als onrust, vermoeidheid, slapeloosheid, vergeetachtigheid
struma	1	1	vergroting van de schildklier- verschijnsel bij veel schildklieraandoeningen
subcutaan	1	1	onderhuids- een subcutane injectie is een injectie net onder de huid
subtotale colectomie	1	1	operatieve verwijdering van het grootste gedeelte van de dikke darm
syndroom van klinefelter	1	1	uitsluitend bij mannen voorkomend syndroom met een onvoldoende ontwikkeling en functie van de geslachtsklieren ten gevolge van een chromosoomafwijking
systeemtherapie	1	1	therapie waarbij ervan uitgegaan wordt dat niet de individuele patiënt/cliënt, maar het systeem waarvan hij deel uit maakt, geholpen moet worden- het systeem wordt gevormd door mensen met wie hij samenleeft, partner, gezin of met wie hij een andere relatie heeft zoals vrienden en familieleden
transplantaties	2	2	operaties waarbij falende organen of weefsels worden vervangen door gezonde
tremors	1	1	beving, onwillekeurige trillingen van een of meer lichaamsdelen, als verschijnsel bij bepaalde ziekten, als bijwerking van medicijnen of zonder aantoonbare oorzaak
tumoren	1	1	goedaardige of kwaadaardige gezwellen
uitslagen	5	5	uitkomst van een medisch onderzoek
uitzaaiingen	3	1	tumoren ontstaan in het lichaam door verspreiding van kankercellen door de bloed- en/of lymfebaan naar een andere plaats
urineonderzoek	1	1	onderzoek van de urine om aandoeningen op te sporen
urineproductie	1	1	vorming van urine in de nieren
urineverlies	1	1	ongewild urineverlies, optredend zowel &apos-s nachts als overdag, door lichamelijke, soms psychische oorzaak
urineweginfecties	2	2	ontstekingen van nieren, urineleider, blaas en/of plasbuis
urodynamisch onderzoek	1	1	onderzoek van de urinewegen
urologen	2	2	medisch specialisten die zich bezighouden met onderzoek en behandeling van aandoeningen aan de urinewegen en aandoeningen van de mannelijke geslachtsorganen
urologie	1	1	medisch specialisme dat zich bezighoudt met onderzoek en behandeling van aandoeningen aan de urinewegen en aandoeningen van de mannelijke geslachtsorganen
vaatchirurgie	2	2	chirurgische behandeling van afwijkingen aan bloedvaten- bij herstel van aders kan gebruikgemaakt worden van aders elders uit het lichaam of van kunststof
vaatziekten	1	1	aandoeningen van de bloedvaten
valangst	2	1	bang zijn om te vallen (en daarbij iets te breken)- komt met name voor bij ouderen
vergiftiging	1	1	verstoring van de levensfuncties door een te hoge concentratie van een bepaalde stof in het lichaam
verhoging	1	1	lichaamstermperatuur tussen de 37,5 en 38 graden Celsius, verschijnsel bij infectieziekten en ontstekingsprocessen
verkoudheid	1	1	ontsteking van het slijmvlies in de neus, de bijholten en de keel- gekenmerkt door een lopende of verstopte neus, niezen, tranende ogen, hoesten, vermoeidheid en/of hoofdpijn
verminderde eetlust	1	1	minder trek in eten door bijvoorbeeld een ziekte, medische behandeling of medicijnen
vernauwingen	3	3	verengingen of bijna-afsluitingen van een kanaal, ader of een opening in het menselijk lichaam
verpleegafdelingen	2	2	afdelingen in zorginstellingen zoals ziekenhuizen en verpleeghuizen waar mensen verpleegd worden
verpleegkundig specialisten	1	1	ervaren verpleegkundigen met een erkende specifieke masteropleiding (tot verpleegkundig specialist) en ervaring op het niveau van expert, die individueel en zelfstandig patiënten begeleiden en behandelen en zich naast de zorgverlening ook bezighouden met bijvoorbeeld beleidsontwikkeling, verspreiding van kennis en innovaties en het opzetten van praktijkgericht onderzoek- mogen zelfstandig bepaald…
verstopping	1	1	trage, moeilijke ontlasting doordat deze te lang in de dikke darm is verbleven door te weinig drinken, weinig vezels in de voeding, te weinig lichaamsbeweging, stress of door sommige medicijnen
verzakking	1	1	het naar beneden zakken van organen uit de buikholte (blaas, baarmoeder of endeldarm) door een verzwakte bekkenbodem- ook verzakking van weefsels, zoals bij een mitralisklepprolaps (een vervorming van een hartklep)
vetbulten	1	1	goedaardige vetweefselgezwellen
vitamine b12	1	1	vitamine die alleen voorkomt in voedingsmiddelen van dierlijke producten zoals vlees en zuivel- speelt een belangrijke rol bij de vorming van gezonde rode bloedcellen, bij de werking van het zenuwstelsel en bij de stofwisseling van foliumzuur
vitamine d	3	3	vitamine die vooral voorkomt in halvarine, margarine, bak- en braadproducten, vlees, volle melk(producten) en vette vis- de zon vormt echter de belangrijkste bron omdat deze zorgt voor aanmaak van de vitamine in de huid- speelt voornamelijk een rol bij de opbouw van botten en tanden en bij de opname van calcium en fosfor in het lichaam
vulva	2	1	uitwendige geslachtsorganen van de vrouw, bestaande uit schaamlippen en schaamspleet, clitoris en venusheuvel
witte bloedcellen	4	4	bloedcellen die het lichaam beschermen tegen infecties
wormmiddelen	1	1	medicijnen die gebruikt worden bij de behandeling van worminfecties
zaadballen	1	1	deel van het mannelijk geslachtsorgaan waar zaadcellen en geslachtshormonen worden geproduceerd
zelfmetingen	1	1	het zelf meten van informatie over het eigen lichaam door de patiënt met behulp van apparaten, apps en internettoepassingen- te denken valt aan het meten van de bloeddruk, hartslag, lichaamstemperatuur, slaappatroon of bloedsuikerspiegel
zenuwen	2	1	bundels vezels die uitlopers zijn van zenuwcellen
ziekte van pfeiffer	1	1	infectieziekte veroorzaakt door een virus in het speeksel, waarbij vermoeidheid vaak het meest opvallende verschijnsel is
ziekte van raynaud	1	1	bloedcirculatiestoornis, meestal veroorzaakt door kou, waarbij een tijdelijke vernauwing optreedt in de bloedvaten van vingers en/of tenen, waardoor deze eerst wit en gevoelloos of pijnlijk worden en daarna blauwpaars en rood- kan ook voorkomen bij bepaalde reumatische aandoeningen zoals sclerodermie, systemische lupus erythematodes en de ziekte van Sjögren
zuivelproducten	1	1	levensmiddelen die invloed hebben op de werking van een aantal medicijnen
zuurstoftherapie	1	1	toediening van (extra) zuurstof in de behandeling van bepaalde aandoeningen, zoals bij clusterhoofdpijn of bij longaandoeningen die tot een laag zuurstofgehalte van het bloed leiden om daarmee de zuurstofvoorziening naar de hersenen, de spieren en de andere organen te bevorderen
zwangerschap	2	2	periode van ongeveer negen maanden waarin zich in de baarmoeder van de vrouw een bevruchte eicel innestelt en zich ontwikkelt tot een kind dat rijp is voor geboorte

## Sheet: Statistics
statistic	description	value	unit
Number of letters	Per participant	2 (2-3)	median (IQR)
Number of words	Per letter	214 (144-395)	median (IQR)
Number of difficult terms	Per participant	21 (19.5-31)	median (IQR)
Difficult term ease medians	Per participant	8.5 (6.5-20.75)	median (IQR)
Number of clarified terms	Per participant	2 (1-4)	median (IQR)
Number of clarifications	Per participant	26 (22-44)	median (IQR)
Percentage of terms clarified	Per participant	0.083 (0.0465-0.135)	median (IQR)
Difficult term clarification ease	Per participant	93 (72-96)	median (IQR)
Difficult term clarification usefulness	Per participant	90 (76-97)	median (IQR)
Easy term clarification ease	Per participant	96 (94.25-99.5)	median (IQR)
Easy term clarification usefulness	Per participant	4 (1.5-18.75)	median (IQR)
Easy term ease	Per participant	99 (97-100)	median (IQR)
Precision	Per participant	0.0652173913043478 (0.0227272727272727-0.1425)	median (IQR)
Recall	Per participant	0.0833333333333333 (0.0465367965367965-0.135)	median (IQR)
Precision (positive predictive value)	Overall	8.37	%
Recall (sensitivity)	Overall	10.2	%
Precision confidence interval	Overall	5.88574645034921 - 10.850655223291	%
Recall confidence interval	Overall	7.20748492359549 - 13.2006783417106	%
Tool ease	Per participant	98 (93.5-99)	median (IQR)
Tool usefulness	Per participant	79 (52.5-97)	median (IQR)
